# Supplementary material for: Ligand-controlled exposure of active sites on the Pd1Ag14 nanocluster surface to boost electrocatalytic CO2 reduction
Source: Royal Society of Chemistry journal article supplement (doi:10.1039/d4cc00152d), 2024-01-01
Supplement: d4cc00152d1.pdf [file d4cc00152d1.pdf]

## Supporting Information

### Ligand-controlled exposure of active sites on Pd<sub>1</sub>Ag<sub>14</sub> nanoclusters surface to boost electrocatalytic CO<sub>2</sub> reduction

Along Ma,<sup>a,b</sup> Yonggang Ren,<sup>b</sup> Yang Zuo,<sup>b</sup> Jiawei Wang,<sup>b</sup> Shutong Huang,<sup>b</sup> Xiaoshuang Ma<sup>b</sup> and Shuxin Wang<sup>\*a,b</sup>

<sup>a</sup>Shandong Key Laboratory of Biochemical Analysis, College of Chemistry and Molecular Engineering, Qingdao University of Science and Technology, Qingdao 266042, P. R. China.

<sup>b</sup>College of Materials Science and Engineering, Qingdao University of Science and Technology, Qingdao 266042, P. R. China.

\*Corresponding authors. E-mail: [shuxin\\_wang@qust.edu.cn](mailto:shuxin_wang@qust.edu.cn)

Notes: The authors declare no competing financial interest.

### Table of Contents

#### Section 1. Experimental procedures

- I. Synthesis
- II. Characterization
- III. Electrochemical measurements

#### Section 2. Supporting Figures

**Fig. S1** The optical microscopic image of the single crystals of the Pd<sub>1</sub>Ag<sub>14</sub>-S and Pd<sub>1</sub>Ag<sub>14</sub>-E nanoclusters.

**Fig. S2** UV-vis absorption spectra (photon energy scale) of the Pd<sub>1</sub>Ag<sub>14</sub>-S and Pd<sub>1</sub>Ag<sub>14</sub>-E nanoclusters.

**Fig. S3** XPS spectra of the Pd<sub>1</sub>Ag<sub>14</sub>-S and Pd<sub>1</sub>Ag<sub>14</sub>-E nanoclusters.

**Fig. S4** The overall structure of the Pd<sub>1</sub>Ag<sub>14</sub>-S and Pd<sub>1</sub>Ag<sub>14</sub>-E nanoclusters.

**Fig. S5** ESI-MS spectra of Pd<sub>1</sub>Ag<sub>14</sub>-S and Pd<sub>1</sub>Ag<sub>14</sub>-E nanoclusters.

**Fig. S6** TGA spectra of the Pd<sub>1</sub>Ag<sub>14</sub>-S and Pd<sub>1</sub>Ag<sub>14</sub>-E nanoclusters.

**Fig. S7** SEM image and corresponding elemental mapping images of the Pd<sub>1</sub>Ag<sub>14</sub>-S nanocluster.

**Fig. S8** SEM image and corresponding elemental mapping images of the Pd<sub>1</sub>Ag<sub>14</sub>-E nanocluster.

**Fig. S9** Photographs of crystals of Pd<sub>1</sub>Ag<sub>14</sub>-S was separated using PTLC, and the corresponding UV was shown.

**Fig. S10** Photographs of crystals of Pd<sub>1</sub>Ag<sub>14</sub>-E was separated using PTLC, and the corresponding UV was shown.

**Fig. S11** A unit cell in the Pd<sub>1</sub>Ag<sub>14</sub>-S single crystal.

**Fig. S12** A unit cell in the Pd<sub>1</sub>Ag<sub>14</sub>-E single crystal.

**Fig. S13** Packing mode of Pd<sub>1</sub>Ag<sub>14</sub>-S in the crystal shown.

**Fig. S14** Packing mode of Pd<sub>1</sub>Ag<sub>14</sub>-E in the crystal shown.

**Fig. S15** Top view of the **Pd<sub>1</sub>Ag<sub>14</sub>-S** and **Pd<sub>1</sub>Ag<sub>14</sub>-E** nanoclusters.

**Fig. S16** Structural comparison and bond length among **Pd<sub>1</sub>Ag<sub>14</sub>-S** and **Pd<sub>1</sub>Ag<sub>14</sub>-E** nanoclusters.

**Fig. S17** The UV-vis spectra of the conversion from **Pd<sub>1</sub>Ag<sub>14</sub>-S** to **Pd<sub>1</sub>Ag<sub>14</sub>-S\***.

**Fig. S18** Photographs of crystals of **Pd<sub>1</sub>Ag<sub>14</sub>-S\*** was separated using PTLC, and the corresponding UV was shown.

**Fig. S19** ESI-MS spectra of **Pd<sub>1</sub>Ag<sub>14</sub>-S\*** nanoclusters.

**Fig. S20** MALDI mass spectra of **Pd<sub>1</sub>Ag<sub>14</sub>-S\*** nanoclusters, and detailed species analysis.

**Fig. S21** MALDI mass spectra of **Pd<sub>1</sub>Ag<sub>14</sub>-S** nanoclusters, and detailed species analysis.

**Fig. S22** MALDI mass spectra of **Pd<sub>1</sub>Ag<sub>14</sub>-E** nanoclusters, and detailed species analysis.

**Fig. S23** XPS spectrum of the **Pd<sub>1</sub>Ag<sub>14</sub>-S\*** nanocluster.

**Fig. S24** SEM image and corresponding elemental mapping images of the **Pd<sub>1</sub>Ag<sub>14</sub>-S\*** nanocluster.

**Fig. S25** The <sup>1</sup>H NMR spectra of the catholyte reaction solution for **Pd<sub>1</sub>Ag<sub>14</sub>-S/C**, **Pd<sub>1</sub>Ag<sub>14</sub>-S\*/C** and **Pd<sub>1</sub>Ag<sub>14</sub>-E/C**.

**Fig. S26** H<sub>2</sub> faradaic efficiency and partial current density of the **Pd<sub>1</sub>Ag<sub>14</sub>-S/C**, **Pd<sub>1</sub>Ag<sub>14</sub>-S\*/C** and **Pd<sub>1</sub>Ag<sub>14</sub>-E/C**.

**Fig. S27** UV-vis absorbance spectra of the three nanoclusters before and after eCO<sub>2</sub>RR.

### Section 3. Supporting Table

**Table S1** The crystal structure parameters for **Pd<sub>1</sub>Ag<sub>14</sub>(PPh<sub>3</sub>)<sub>8</sub>(SPh(CF<sub>3</sub>)<sub>2</sub>)<sub>6</sub> (Pd<sub>1</sub>Ag<sub>14</sub>-S).**

**Table S2** The crystal structure parameters for **Pd<sub>1</sub>Ag<sub>14</sub>(P(Ph-p-OMe)<sub>3</sub>)<sub>7</sub>(SPh)<sub>6</sub> (Pd<sub>1</sub>Ag<sub>14</sub>-E).**

**Table S3** The atomic ratio of Pd, Ag, S, P, F, and O elements in **Pd<sub>1</sub>Ag<sub>14</sub>-S\*** nanocluster was calculated by XPS and EDS measurements.

**Table S4** Based on Ag atom (one **Pd<sub>1</sub>Ag<sub>14</sub>-S\*** nanocluster contains 14 Ag atoms), the ratio of Ag, F, and O elements in **Pd<sub>1</sub>Ag<sub>14</sub>-S\*** nanocluster was calculated by XPS and EDS measurements in Table 3.

## Section 1. Experimental procedures

### I. Synthesis

**Chemicals:** All reagents were commercially available and used without further purification. Palladium (II) acetylacetonate ( $C_{10}H_{14}O_4Pd$ , 99% metal basis), silver acetate ( $CH_3COOAg$ , 98% metals basis), phenyl mercaptan ( $PhSH$ , 99%), 3,5-bis(trifluoromethyl)thiophenol ( $(CF_3)_2PhSH$ , 99%), triphenylphosphine ( $PPh_3$ , 98.8%), tris(4-methoxyphenyl)phosphine ( $P(Ph-p-OMe)_3$ , 98%), sodium borohydride ( $NaBH_4$ , 98%), cesium acetate ( $CH_3COOCs$ , 98%), methyl alcohol ( $CH_3OH$ , HPLC grade), ethyl alcohol ( $CH_3CH_2OH$ , HPLC grade), dichloromethane ( $CH_2Cl_2$ , HPLC grade), acetonitrile ( $CH_3CN$ , HPLC grade) and n-hexane (Hex, HPLC grade), were used to carry out the experiments. All glassware was thoroughly cleaned with aqua regia ( $V_{HCl} : V_{HNO_3} = 3:1$ ), rinsed with copious pure water, and then dried in an oven prior to use.

**Synthesis of  $Pd_1Ag_{14}(PPh_3)_8(SPh(CF_3)_2)_6$  ( $Pd_1Ag_{14-S}$ ) nanocluster:** The reaction was conducted in an ice bath. Typically,  $C_{10}H_{14}O_4Pd$  (6 mg, 0.020 mmol) and  $CH_3COOAg$  (50 mg, 0.3 mmol, dissolved in 1 mL of  $H_2O$ ) were added to a mixture of 10 mL  $CH_3CH_2OH$  and 10 mL  $CH_2Cl_2$  under vigorous stirring. After stirring for 5 minutes,  $PPh_3$  (200 mg, 0.76 mmol) and  $(CF_3)_2PhSH$  (162  $\mu$ L, 0.96 mmol) were introduced to the mixture. The reaction solution turned colorless and transparent after 30 minutes. Subsequently, a freshly prepared solution of  $NaBH_4$  (42 mg, 1.1 mmol, dissolved in 2 mL of  $H_2O$ ) was added, causing the solution to gradually darken. The reaction proceeded for 12 hours, yielding the  $Pd_1Ag_{14}(PPh_3)_8(SPh(CF_3)_2)_6$  nanocluster with an approximate 23% yield (based on Ag atom). The crude product was washed three times with  $CH_3OH$  to remove by-products. Dark red, block-shaped crystals were obtained by crystallizing the purified nanoclusters in DCM/Hex (1 : 3) system at 4°C over 4 days.

**Synthesis of  $Pd_1Ag_{14}(P(Ph-p-OMe)_3)_7(SPh)_6$  ( $Pd_1Ag_{14-E}$ ) nanocluster:** The  $Pd_1Ag_{14-E}$  nanocluster was synthesized utilizing a methodology similar to that used for the  $Pd_1Ag_{14-S}$  nanocluster. The molar ratio of  $P(Ph-p-OMe)_3$  used was equivalent to that of the  $PPh_3$  ligand in the  $Pd_1Ag_{14-S}$  synthesis, and the molar ratio of  $PhSH$  was maintained identical to that of the  $(CF_3)_2PhSH$  ligand. Detailedly,  $C_{10}H_{14}O_4Pd$  (6 mg, 0.020 mmol) and  $CH_3COOAg$  (50 mg, 0.3 mmol, dissolved in 1 mL of  $H_2O$ ) were added to a mixture of 10 mL  $CH_3CH_2OH$  and 10 mL  $CH_2Cl_2$  under vigorous stirring. After stirring for 5 minutes,  $P(Ph-p-OMe)_3$  (268 mg, 0.76 mmol) and  $PhSH$  (99  $\mu$ L, 0.96 mmol) were introduced. The reaction solution transitioned light red and transparent after 30 minutes. Successively, a freshly prepared solution of  $NaBH_4$  (42 mg, 1.1 mmol, dissolved in 2 mL of  $H_2O$ ) was added, causing the solution to gradually darken. The reaction was maintained for 12 hours, yielding the  $Pd_1Ag_{14}(P(Ph-p-OMe)_3)_7(SPh)_6$  nanocluster with an approximate 15% yield (based on Ag atom). Post-synthesis, the crude product was subjected to three washes with  $CH_3OH$  to remove impurities. Finally, dark red, block-shaped crystals were obtained from the purified nanoclusters by crystallization in a DCM/Hex (1 : 3) mixture at 4°C over a period of 4 days.

**Conversion from  $Pd_1Ag_{14}(PPh_3)_8(SPh(CF_3)_2)_6$  ( $Pd_1Ag_{14-S}$ ) to  $Pd_1Ag_{14-S}^*$ .** The  $Pd_1Ag_{14-S}$  (10 mg, 0.00193 mmol) single crystals were dissolved in 15 mL of  $CH_2Cl_2$ . Then  $P(Ph-p-OMe)_3$  (5.44 mg, 0.0154 mmol) and  $PhSH$  (1.2  $\mu$ L, 0.0116 mmol) ligands were dissolved in 1 mL of  $CH_2Cl_2$  and added to reaction under vigorous stirring. After about 8 min,  $Pd_1Ag_{14-S}$  nanoclusters were converted into the  $Pd_1Ag_{14-S}^*$  nanoclusters, then massive  $CH_3CN$  was added to stop the reaction. To acquire the pure  $Pd_1Ag_{14-S}^*$ , the crude product was washed two times with  $CH_2Cl_2/CH_3OH$  (1 : 10) to remove excess mercaptan and phosphine ligands (yield ~90 %, Ag atom basis). The solid powder of  $Pd_1Ag_{14-S}^*$  was stored in the refrigerator and kept in reserve.

## II. Characterization

**Ultraviolet-visible spectroscopy (UV-vis):** The UV-vis measurements in this study were recorded on a Shanghai Metash UV-8000 spectrophotometer. All samples were dissolved in CH<sub>2</sub>Cl<sub>2</sub> for spectrum measurements.

**X-ray photoelectron spectroscopy (XPS):** The XPS measurements were performed on ESCALAB XI+ configured with a monochromated Al<sub>K $\alpha$</sub>  (1486.8 eV) 150W X-ray source, 0.5 mm circular spot size, a flood gun to counter charging effects, and the analysis chamber base pressure lower than 1 x10<sup>-9</sup> mbar, data were collected with FAT = 20 eV. The crystal particles of **Pd<sub>1</sub>Ag<sub>14</sub>-S** and **Pd<sub>1</sub>Ag<sub>14</sub>-E** were tested by sticking on packaging tape for testing. And the **Pd<sub>1</sub>Ag<sub>14</sub>-S\*** pure product was dissolved in CH<sub>2</sub>Cl<sub>2</sub> to form a concentrated solution and then applied to the surface of packaging tape for testing. Then, a small amount of carbon was added to help with the data correction.

**Scanning electron microscope-energy dispersive spectrometer (SEM-EDS):** SEM-EDS was conducted on JSM-6700F. The crystal particles of **Pd<sub>1</sub>Ag<sub>14</sub>-S** and **Pd<sub>1</sub>Ag<sub>14</sub>-E** were tested by sticking on a conductive adhesive with an accelerating voltage of 0.1-30 kV. And the **Pd<sub>1</sub>Ag<sub>14</sub>-S\*** pure product was dissolved in CH<sub>2</sub>Cl<sub>2</sub> to form a concentrated solution and then applied to the surface of silicon wafers for testing.

**Thermogravimetric analysis (TGA):** TGA was carried out on a thermogravimetric analyzer (DTG-60H) with ~8 mg of nanoclusters in a SiO<sub>2</sub> pan at a heating rate of 20 K/min under an N<sub>2</sub> atmosphere. And the sample was extracted for 4 hours to remove the solvent molecules using a vacuum pump, before TGA testing.

**Nuclear magnetic resonance (NMR):** NMR measurements were performed using a Bruker Avance spectrometer operating at 400 MHz for <sup>1</sup>H. For the preparation sample, after 400  $\mu$ L of the cathode reaction solution and 200  $\mu$ L of D<sub>2</sub>O (using DMSO as an internal standard) were mixed, <sup>1</sup>H NMR tests were performed directly.

**Electrospray ionization mass spectrometry (ESI-MS):** ESI-MS measurements were carried out on a Bruker micro TOF-Q system in positive or negative ion mode in the range  $m/z = 1000-10000$ . To prepare the ESI sample, clusters were dissolved in CH<sub>2</sub>Cl<sub>2</sub>/CH<sub>3</sub>OH (V/V = 1 : 3) and diluted in the same solvent to a concentration of approximately 100 ppm and the molar ratio of clusters to CH<sub>3</sub>COOCs is 1 : 30.

**Matrix-assisted laser desorption ionization-time of flight mass spectrometry (MALDI-TOF-MS):** MALDI-MS was performed on a Bruker Microflex LRF. Trans-2-[3-(4-tert-butylphenyl)-2-methyl-2-propenyldiene]-malononitrile (DCTB) was used as the matrix with a 1 : 500 analyte matrix ratio and dissolved in CH<sub>2</sub>Cl<sub>2</sub>. A volume of 3  $\mu$ L of the analyte matrix mixture was applied to the target and air-dried.

**X-ray crystallography:** The data collections for single crystal X-ray diffraction (SC-XRD) were carried out on a Bruker D8 Quest at 170 K, using a Mo-K $\alpha$  radiation ( $\lambda = 0.71073$  Å). The structure was solved by intrinsic phasing and refined with full-matrix least squares on F<sup>2</sup> using the SHELXTL software package. All non-hydrogen atoms were refined anisotropically, and all the hydrogen atoms were set in geometrically calculated positions and refined isotopically using a riding model. Detailed crystal data for **Pd<sub>1</sub>Ag<sub>14</sub>-S** and **Pd<sub>1</sub>Ag<sub>14</sub>-E** nanoclusters are given in Table S1 and S2, respectively. CCDC 2324593 for **Pd<sub>1</sub>Ag<sub>14</sub>-S** and CCDC 2324594 for **Pd<sub>1</sub>Ag<sub>14</sub>-E** contain the supplementary crystallographic data for this paper. These data are provided free of charge by the Cambridge Crystallographic Data Centre.

## III. Electrochemical measurements

To prepare the catalyst sample, the as-prepared **Pd<sub>1</sub>Ag<sub>14</sub>** nanoclusters were loading on Ketjen Carbon (C) with a mass ratio of 1 (5 mg nanoclusters and 5 mg Ketjen Carbon). The catalyst ink was prepared by dispersing the sample in isopropanol (2.5 mg·mL<sup>-1</sup>) under sonication for 20 minutes. Then, 1 mL catalyst suspension and 10 μL Nafion (5 wt.%) were uniformly mixed as the final catalyst ink. Subsequently, 40 μL catalytic ink was dropwise cast onto the carbon cloth (1 × 1 cm<sup>2</sup>) and dried at room temperature as the working electrode. 0.5 M KHCO<sub>3</sub> solution (pH = 7.2 when saturated with CO<sub>2</sub>) was used as the electrolyte.

The electrochemical properties of three catalysts were evaluated on a CHI 760E electrochemical workstation. All electrochemical measurements were carried out in a custom gas-tight H-cell with two compartments separated by Nafion 117 membrane. Each compartment contained 25 mL electrolyte (0.5 M KHCO<sub>3</sub>) with approximately 10 mL headspace. Ag/AgCl in 0.5 M KHCO<sub>3</sub> saturated aqueous electrolyte was employed as the reference electrode. Electrode potentials measured on the Ag/AgCl scale ( $E_{Ag/AgCl}$ ) were converted into the reversible hydrogen electrode (RHE) scale using the following equation:

$$E(RHE) = E(Ag/AgCl) + 0.1976 + 0.0592 \cdot \text{pH}$$

The output of the gas flow from the cathode chamber passes through a gas flow controller (the gas flow controller was used to control the gas flow rate) and then into a gas chromatograph instrument (GC3900Plus, RUI NENG) for on-line identification and quantification of the gaseous products, which was purged for 30 min with an average rate of 10 mL·min<sup>-1</sup> (at room temperature and ambient pressure) prior to the test.

The faradaic efficiency ( $FE_X$ ) and partial current density ( $j_X$ ) of X (X= CO or H<sub>2</sub>) were calculated as below:

$$FE_X = \frac{(N_i \times n \times F)}{Q_t}$$

$$j_X = \frac{FE_X \times Q_t}{t \times \text{Area}}$$

Where

$Q_t$  = total charge consumed in the electrochemical reaction

$N_i$  = the number of moles of the product (measured GC)

$n$  = the number of electrons transferred in the elementary reaction (n is 2 for CO and H<sub>2</sub>)

$F$  = the Faradaic constant (96485 C mol<sup>-1</sup>)

$t$  = reaction time (s)

Area = geometry area of the electrode (1 cm<sup>2</sup>)

After the eCO<sub>2</sub>RR tests were completed, the samples were rinsed with CH<sub>2</sub>Cl<sub>2</sub> and collected for UV-vis characterization.

## Section 2. Supporting Figures

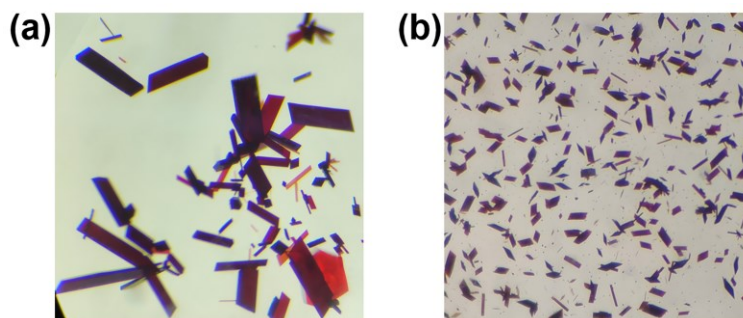

**Fig. S1** The optical microscopic image of the single crystals of Pd<sub>1</sub>Ag<sub>14</sub>-S and Pd<sub>1</sub>Ag<sub>14</sub>-E nanoclusters. (a) Pd<sub>1</sub>Ag<sub>14</sub>-S; (b) Pd<sub>1</sub>Ag<sub>14</sub>-E.

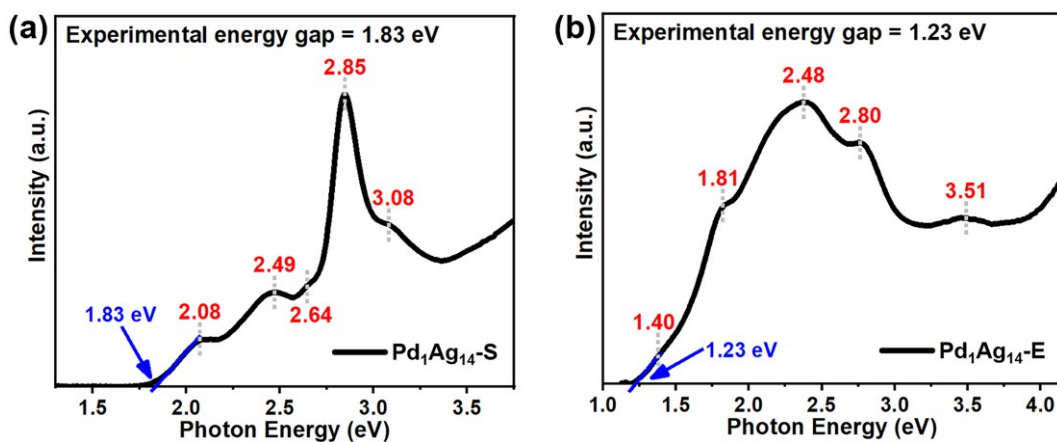

**Fig. S2** UV-vis absorption spectra (photon energy scale) of the Pd<sub>1</sub>Ag<sub>14</sub>-S and Pd<sub>1</sub>Ag<sub>14</sub>-E nanoclusters in CH<sub>2</sub>Cl<sub>2</sub>. (a) Pd<sub>1</sub>Ag<sub>14</sub>-S; (b) Pd<sub>1</sub>Ag<sub>14</sub>-E. The experimental energy gap of the Pd<sub>1</sub>Ag<sub>14</sub>-S and Pd<sub>1</sub>Ag<sub>14</sub>-E nanoclusters in CH<sub>2</sub>Cl<sub>2</sub> was determined as ~1.83 eV and 1.23 eV, respectively.

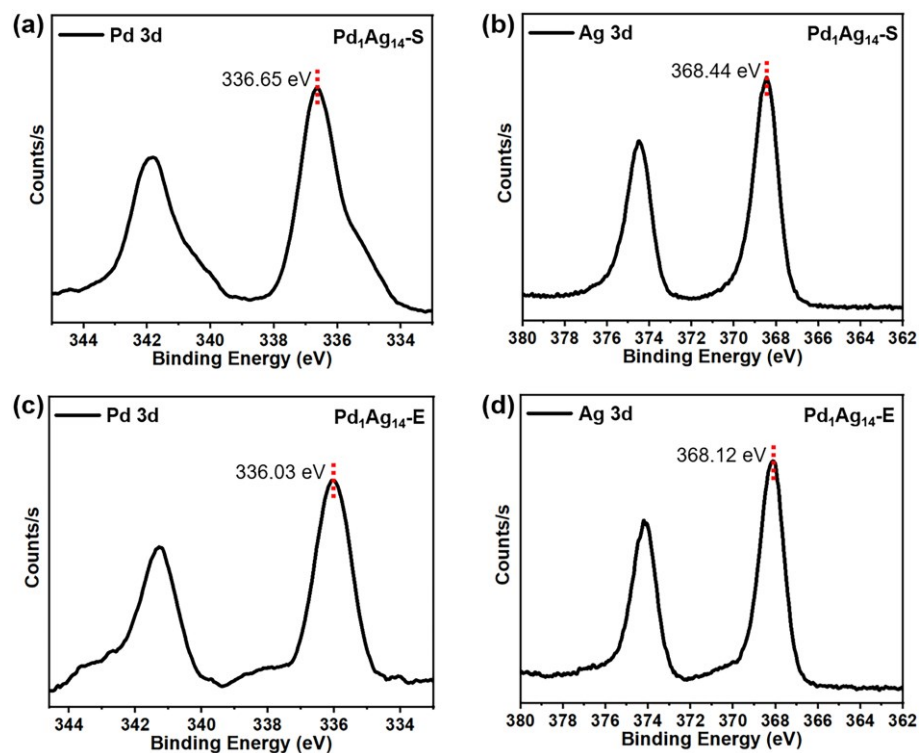

**Fig. S3** XPS spectra of the  $\text{Pd}_1\text{Ag}_{14}\text{-S}$  and  $\text{Pd}_1\text{Ag}_{14}\text{-E}$  nanoclusters. (a) Pd 3d of the  $\text{Pd}_1\text{Ag}_{14}\text{-S}$ ; (b) Ag 3d of the  $\text{Pd}_1\text{Ag}_{14}\text{-S}$ ; (c) Pd 3d of the  $\text{Pd}_1\text{Ag}_{14}\text{-E}$ ; (d) Ag 3d of the  $\text{Pd}_1\text{Ag}_{14}\text{-E}$ .

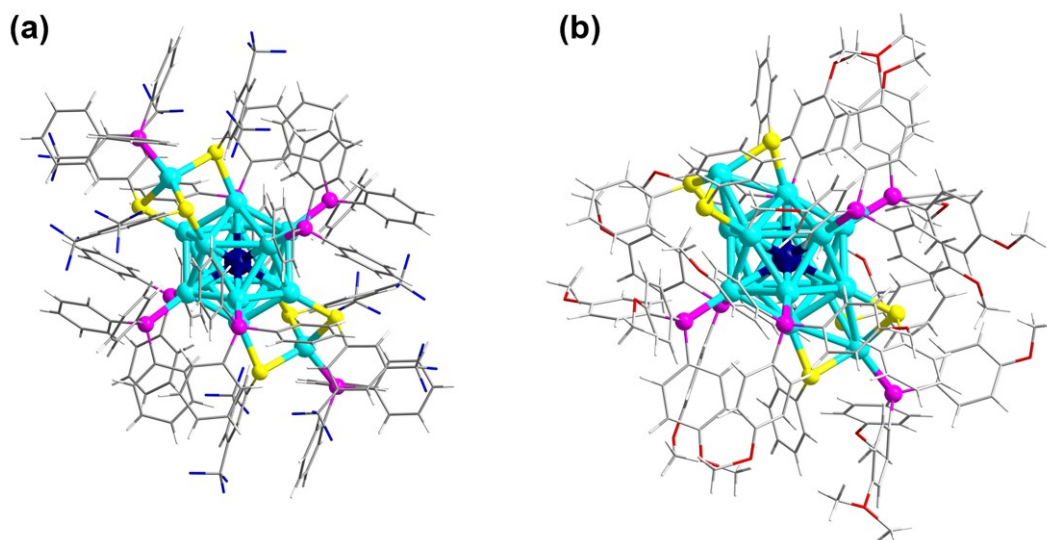

**Fig. S4** The overall structure of the  $\text{Pd}_1\text{Ag}_{14}\text{-S}$  and  $\text{Pd}_1\text{Ag}_{14}\text{-E}$  nanoclusters. (a)  $\text{Pd}_1\text{Ag}_{14}\text{-S}$ ; (b)  $\text{Pd}_1\text{Ag}_{14}\text{-E}$ . Color labels: dark blue = Pd; light blue = Ag; yellow = S; magenta = P; blue = F; red = O; grey = C; white = H.

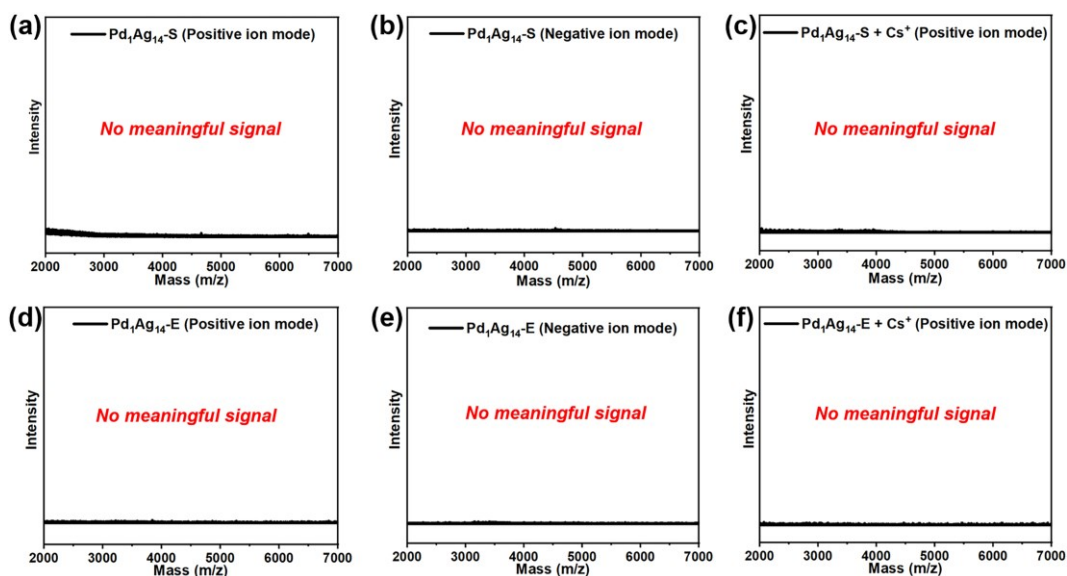

**Fig. S5** ESI-MS spectra of  $\text{Pd}_1\text{Ag}_{14}\text{-S}$  and  $\text{Pd}_1\text{Ag}_{14}\text{-E}$  nanoclusters. (a) and (d) Positive ion mode; (b) and (e) Negative ion mode; (c) and (f) Positive ion mode with the addition of  $\text{Cs}^+$ .

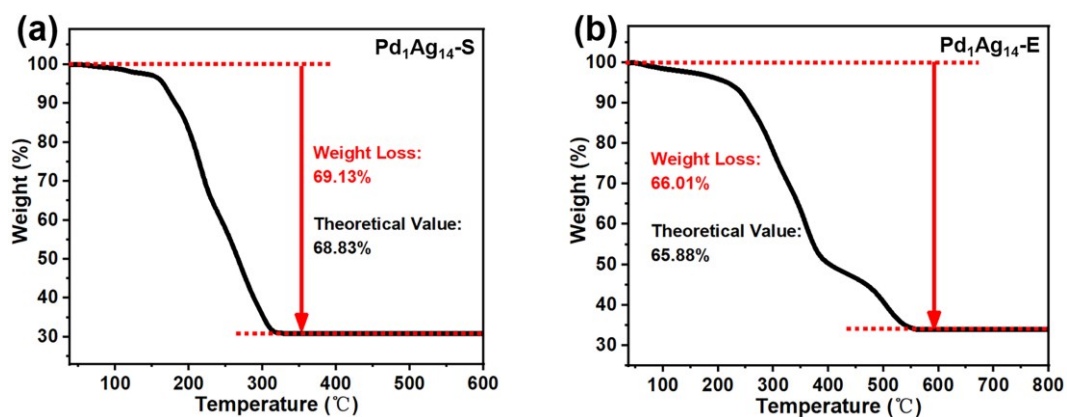

**Fig. S6** TGA spectra of the  $\text{Pd}_1\text{Ag}_{14}\text{-S}$  and  $\text{Pd}_1\text{Ag}_{14}\text{-E}$  nanoclusters. (a)  $\text{Pd}_1\text{Ag}_{14}\text{-S}$ ; (b)  $\text{Pd}_1\text{Ag}_{14}\text{-E}$ .



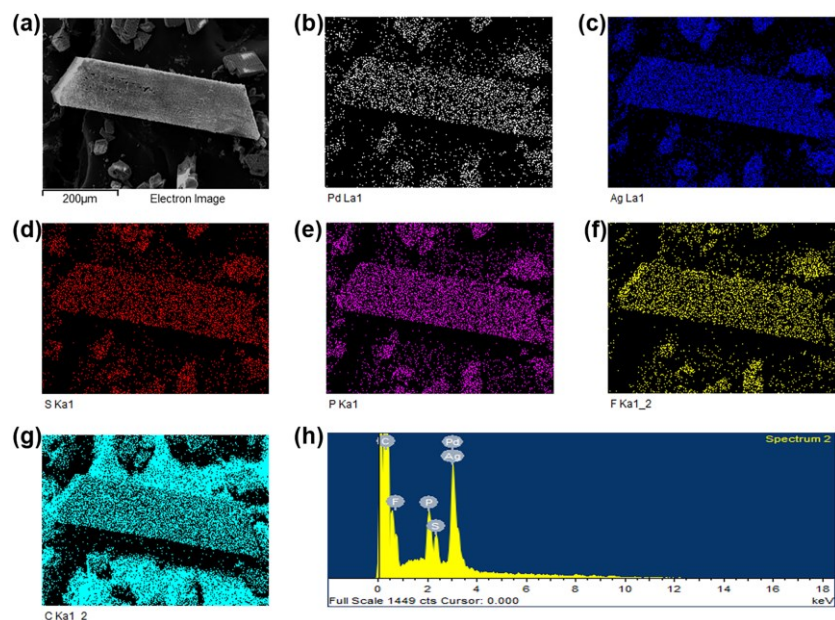

**Fig. S7** SEM image and corresponding elemental mapping images of the  $\text{Pd}_1\text{Ag}_{14}\text{-S}$  nanocluster. (a) SEM image of single crystal; (b)-(g) Elemental mapping images of Pd, Ag, S, P, F and C elements, respectively; (h) EDS spectrum confirming the presence of above elements (Pd, Ag, S, P, F and C) in  $\text{Pd}_1\text{Ag}_{14}\text{-S}$  nanocluster, which is consistent with the cluster composition obtained by SC-XRD.

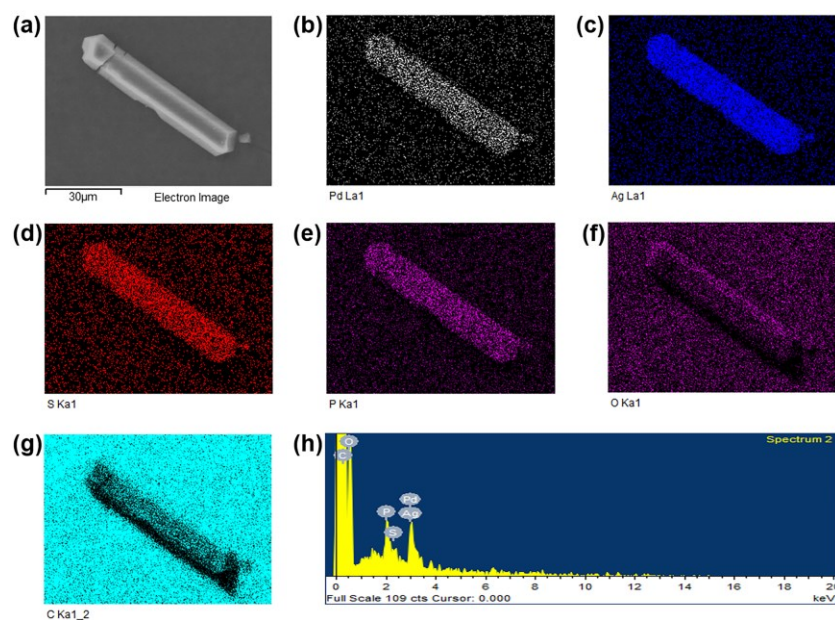

**Fig. S8** SEM image and corresponding elemental mapping images of the  $\text{Pd}_1\text{Ag}_{14}\text{-E}$  nanocluster. (a) SEM image of single crystal; (b)-(g) Elemental mapping images of Pd, Ag, S, P, O and C elements, respectively; (h) EDS spectrum confirming the presence of above elements (Pd, Ag, S, P, O and C) in  $\text{Pd}_1\text{Ag}_{14}\text{-E}$  nanocluster, which is consistent with the cluster composition obtained by SC-XRD.

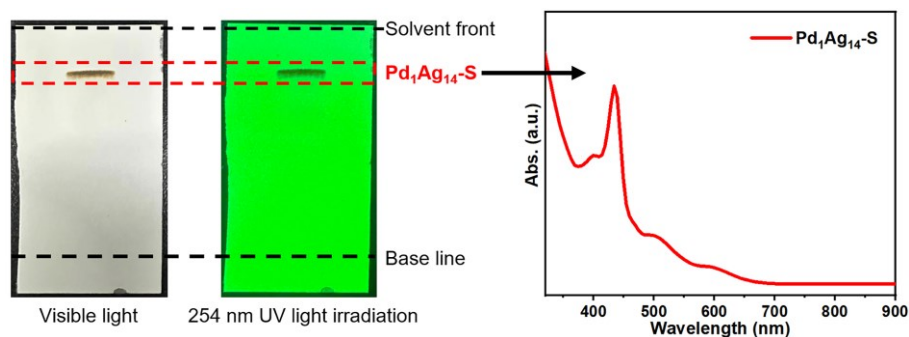

**Fig. S9** Photographs of crystals of  $\text{Pd}_1\text{Ag}_{14}\text{-S}$  was separated using PTLC, and the corresponding UV was shown. Solvent system: the volume ratio of  $\text{CH}_2\text{Cl}_2$  and Hex is 1 : 1.

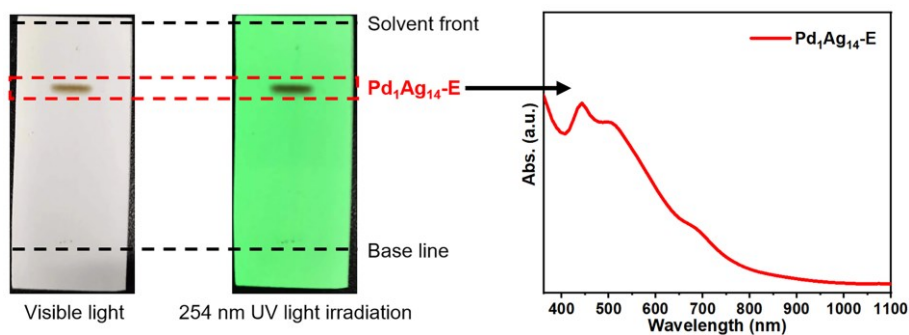

**Fig. S10** Photographs of crystals of  $\text{Pd}_1\text{Ag}_{14}\text{-E}$  was separated using PTLC, and the corresponding UV was shown. Solvent system: the volume ratio of  $\text{CH}_2\text{Cl}_2$  and Hex is 1.5 : 1.

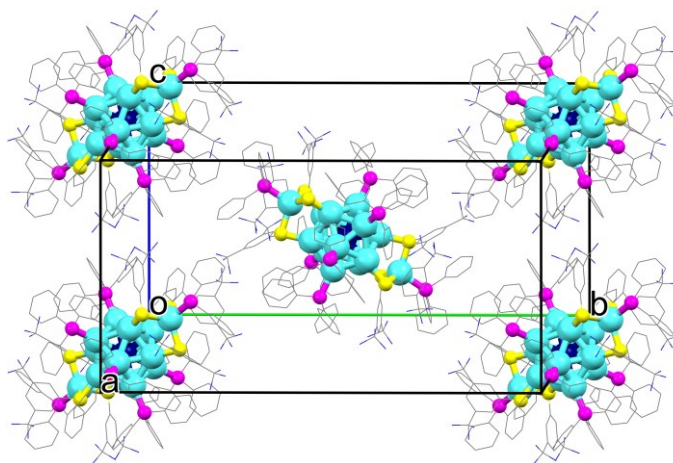

**Fig. S11** A unit cell in the  $\text{Pd}_1\text{Ag}_{14}\text{-S}$  single crystal. Color labels: dark blue = Pd; light blue = Ag; yellow = S; magenta = P; blue = F; grey = C. All H atoms are omitted for clarity.

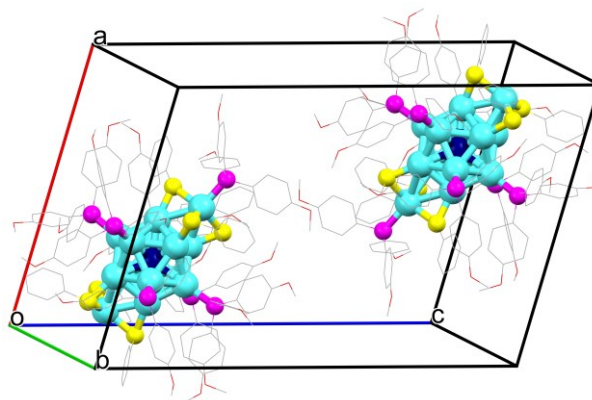

**Fig. S12** A unit cell in the  $\text{Pd}_1\text{Ag}_{14}\text{-E}$  single crystal. Color labels: dark blue = Pd; light blue = Ag; yellow = S; magenta = P; red = O; grey = C. All H atoms are omitted for clarity.

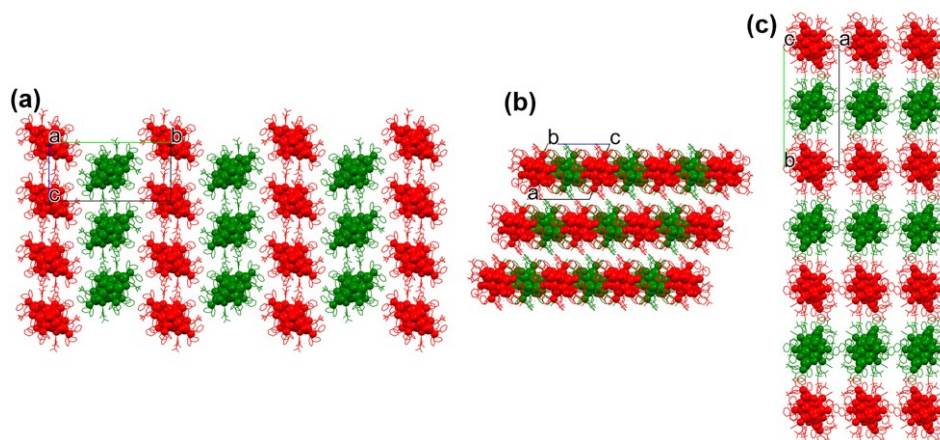

**Fig. S13** Packing mode of  $\text{Pd}_1\text{Ag}_{14}\text{-S}$  in the crystal shown. (a) Along the a axis; (b) along the b axis; (c) along the c axis. All H atoms are omitted for clarity. The cluster molecules arranged in different directions show in different colors.

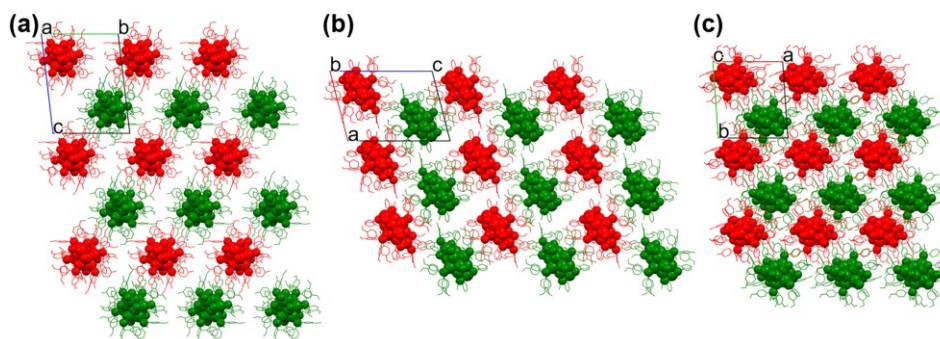

**Fig. S14** Packing mode of  $\text{Pd}_1\text{Ag}_{14}\text{-E}$  in the crystal shown. (a) Along the a axis; (b) along the b axis; (c) along the c axis. All H atoms are omitted for clarity. The cluster molecules arranged in different directions show in different colors.



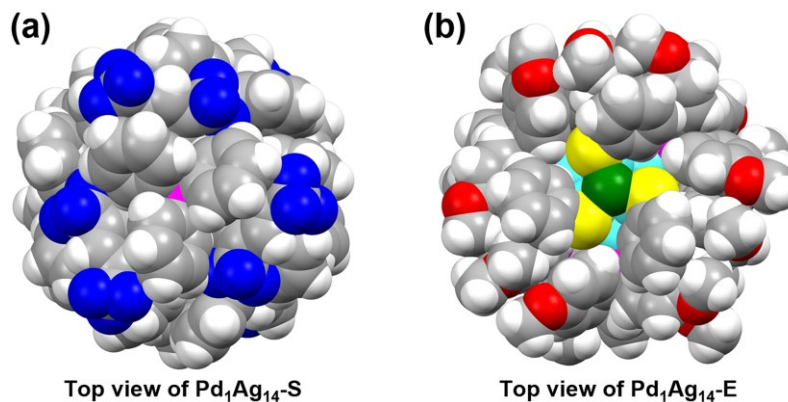

**Fig. S15** Top view of the Pd<sub>1</sub>Ag<sub>14</sub>-S and Pd<sub>1</sub>Ag<sub>14</sub>-E nanoclusters. (a) Pd<sub>1</sub>Ag<sub>14</sub>-S; (b) Pd<sub>1</sub>Ag<sub>14</sub>-E. Color labels: dark blue = Pd; light blue = Ag<sub>icosahedral surface</sub>; green = Ag<sub>shell</sub>; yellow = S; magenta = P; blue = F; red = O; grey = C; white = H.

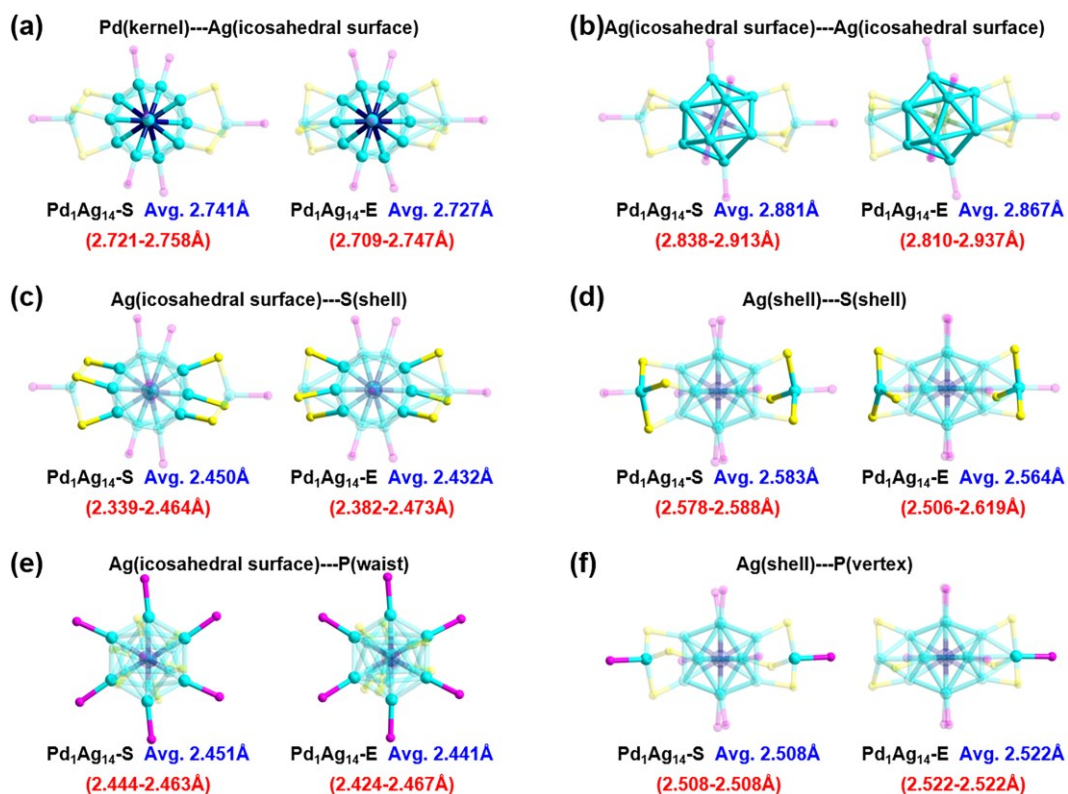

**Fig. S16** Structural comparison and bond length among Pd<sub>1</sub>Ag<sub>14</sub>-S and Pd<sub>1</sub>Ag<sub>14</sub>-E nanoclusters. (a) Comparison of the bond length of Pd(kernel)---Ag(icosahedral surface); (b) Comparison of the bond length of Ag(icosahedral surface)---Ag(icosahedral surface); (c) Comparison of the bond length of Ag(icosahedral surface)---S(shell); (d) Comparison of the bond length of Ag(shell)---S(shell); (e) Comparison of the bond length of Ag(icosahedral surface)---P(waist); (f) Comparison of the bond length of Ag(shell)---P(vertex). The compared bonds are highlighted in solid. Color labels: dark blue = Pd; light blue = Ag; yellow = S; magenta = P.

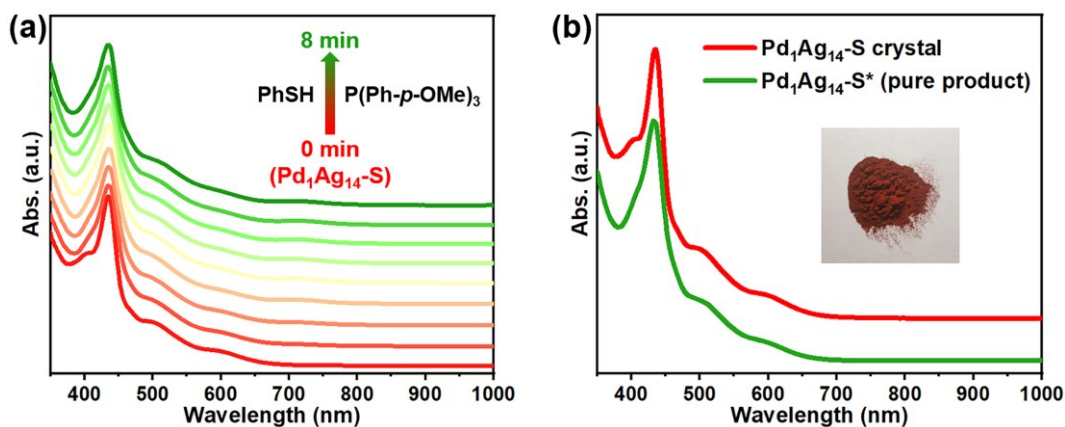

**Fig. S17** (a) The UV-vis spectra of the conversion from  $\text{Pd}_1\text{Ag}_{14}\text{-S}$  to  $\text{Pd}_1\text{Ag}_{14}\text{-S}^*$ ; (b) The UV-vis spectra of  $\text{Pd}_1\text{Ag}_{14}\text{-S}$  crystal (red line) and  $\text{Pd}_1\text{Ag}_{14}\text{-S}^*$  pure product (green line) in  $\text{CH}_2\text{Cl}_2$  (Inset: the photograph of  $\text{Pd}_1\text{Ag}_{14}\text{-S}^*$  solid powder).

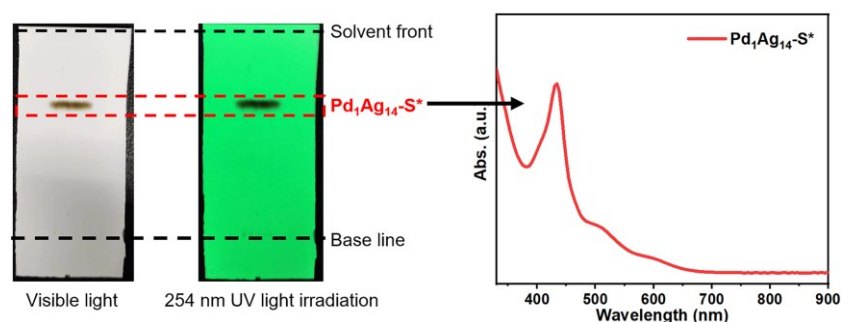

**Fig. S18** Photographs of crystals of  $\text{Pd}_1\text{Ag}_{14}\text{-S}^*$  was separated using PTLC, and the corresponding UV was shown. Solvent system: the volume ratio of  $\text{CH}_2\text{Cl}_2$  and Hex is 1 : 1.

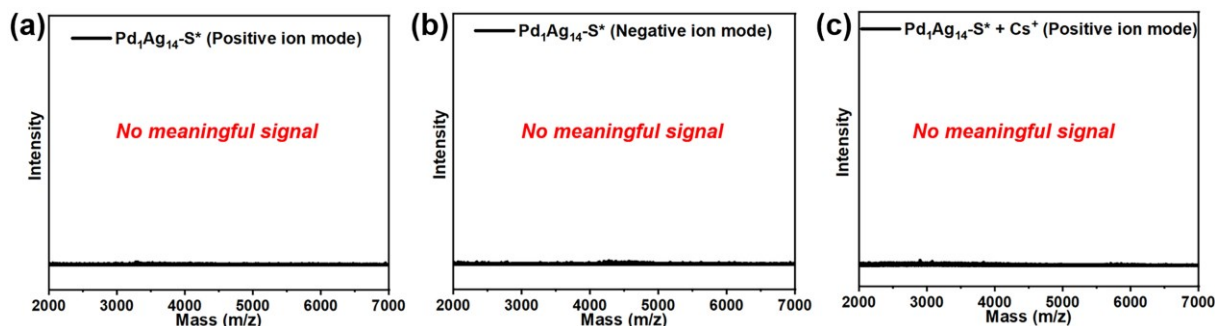

**Fig. S19** ESI-MS spectra of  $\text{Pd}_1\text{Ag}_{14}\text{-S}^*$  nanoclusters. (a) Positive ion mode; (b) Negative ion mode; (c) Positive ion mode with the addition of  $\text{Cs}^+$ .

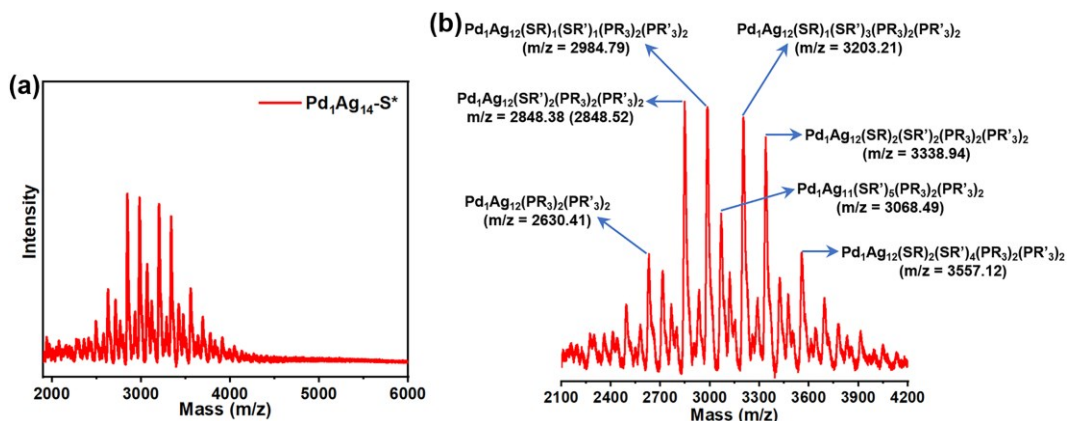

**Fig. S20** (a) MALDI mass spectrum of  $\text{Pd}_1\text{Ag}_{14}\text{-S}^*$  nanoclusters. (b) MALDI mass spectrum of  $\text{Pd}_1\text{Ag}_{14}\text{-S}^*$  nanoclusters from 2100 Da to 4200 Da in Figure S20a, and detailed species analysis. (SR =  $\text{SPh}(\text{CF}_3)_2$ ;  $\text{PR}_3 = \text{PPh}_3$ ;  $\text{SR}' = \text{SPh}$ ;  $\text{PR}'_3 = \text{P}(\text{Ph-}i>p\text{-OMe})_3$ ).

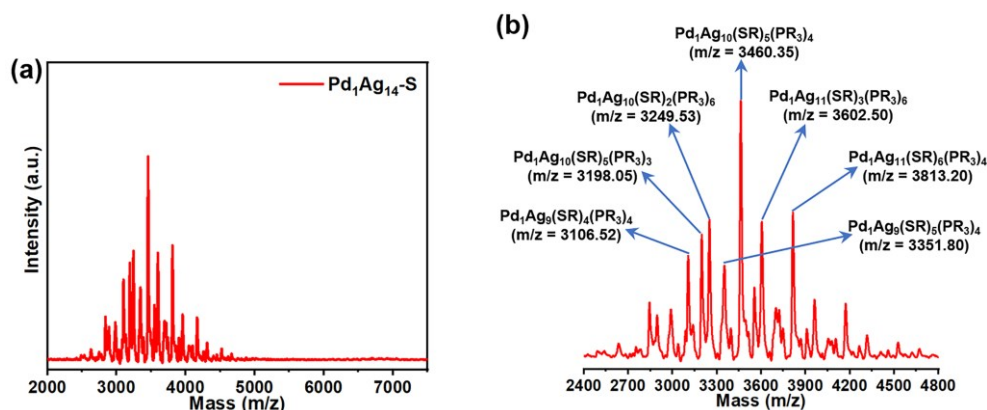

**Fig. S21** (a) MALDI mass spectrum of  $\text{Pd}_1\text{Ag}_{14}\text{-S}$  nanoclusters. (b) MALDI mass spectrum of  $\text{Pd}_1\text{Ag}_{14}\text{-S}$  nanoclusters from 2400 Da to 4800 Da in Figure S21a, and detailed species analysis. (SR =  $\text{SPh}(\text{CF}_3)_2$ ;  $\text{PR}_3 = \text{PPh}_3$ ).

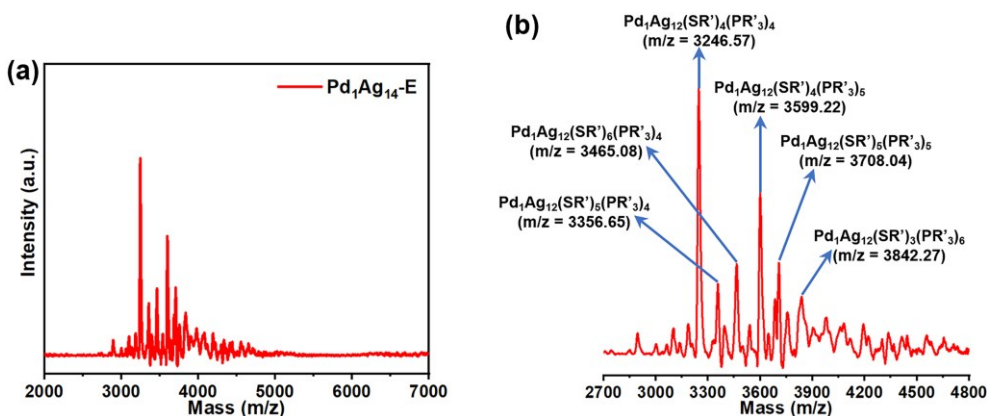

**Fig. S22** (a) MALDI mass spectrum of  $\text{Pd}_1\text{Ag}_{14}\text{-E}$  nanoclusters. (b) MALDI mass spectrum of  $\text{Pd}_1\text{Ag}_{14}\text{-E}$  nanoclusters from 2700 Da to 4800 Da in Figure S22a, and detailed species analysis. (SR' =  $\text{SPh}$ ;  $\text{PR}'_3 = \text{P}(\text{Ph-}i>p\text{-OMe})_3$ ).

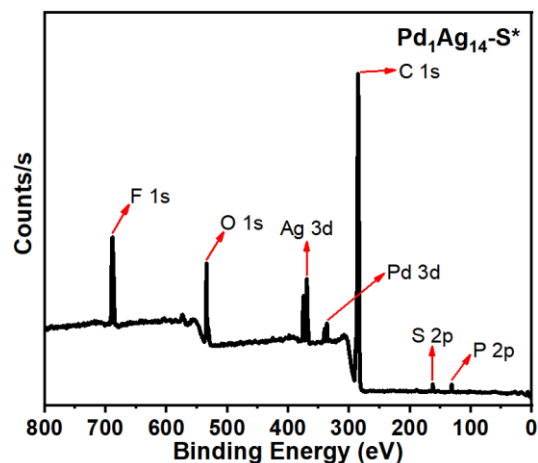

**Fig. S23** XPS spectrum of the  $\text{Pd}_1\text{Ag}_{14}\text{-S}^*$  nanoclusters. XPS result (Fig. S23, Table S3 and Table S4) showed an Ag/ F/ O ratio of 14/ 19.3/ 12.7 based on Ag atom, implying the replacement of approximately 2.8 SR (calculated as  $6(\text{F}) \times 6(\text{SR}) - 19.3(\text{F}) = 16.7(\text{F}) \approx 6(\text{F}) \times 2.8(\text{SR})$ ) ligands with SR' and about 4.2  $\text{PR}_3$  (calculated as  $12.7(\text{O}) \approx 3(\text{O}) \times 4.2(\text{PR}'_3)$ ) ligands with  $\text{PR}'_3$ .

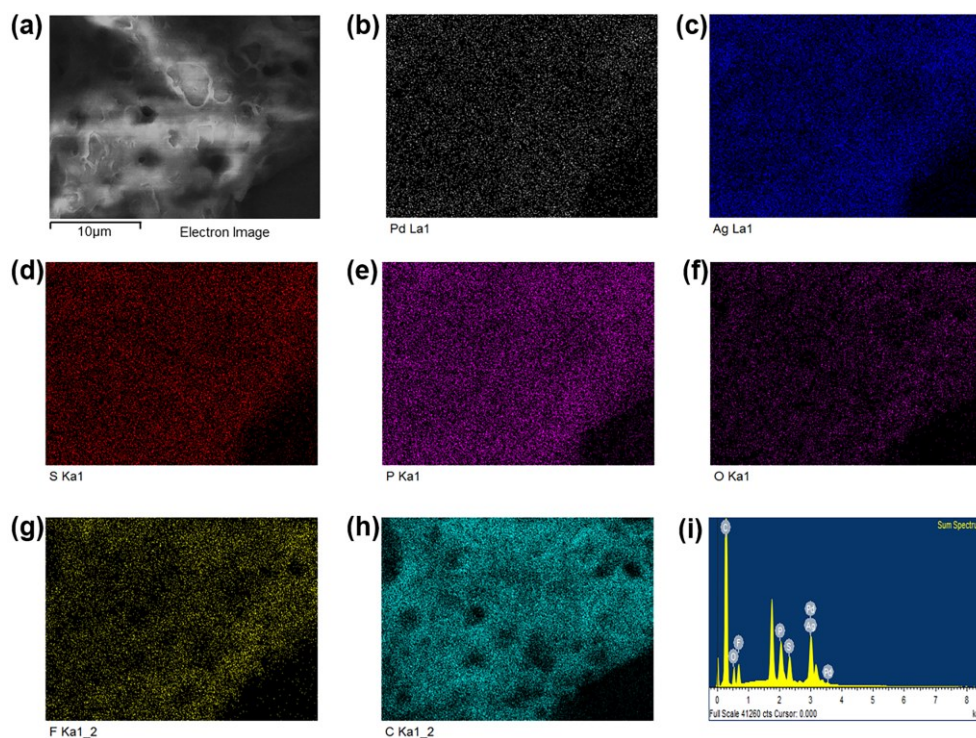

**Fig. S24** SEM image and corresponding elemental mapping images of the  $\text{Pd}_1\text{Ag}_{14}\text{-S}^*$  nanocluster. (a) SEM image of solid product; (b)-(h) Elemental mapping images of Pd, Ag, S, P, O, F and C elements, respectively; (i) EDS spectrum confirming the presence of above elements (Pd, Ag, S, P, O, F and C) in  $\text{Pd}_1\text{Ag}_{14}\text{-S}^*$  nanocluster. EDS result (Fig. S24, Table S3 and Table S4) displayed an Ag/ F/ O ratio of 14/ 15.7/ 11.2, indicating the substitution of about 3.4 SR (calculated as  $6(\text{F}) \times 6(\text{SR}) - 15.7(\text{F}) = 20.3(\text{F}) \approx 6(\text{F}) \times 3.4(\text{SR})$ ) and 3.7  $\text{PR}_3$  (calculated as  $11.2(\text{O}) \approx 3(\text{O}) \times 3.7(\text{PR}'_3)$ ) ligands with SR' and  $\text{PR}'_3$ , respectively.



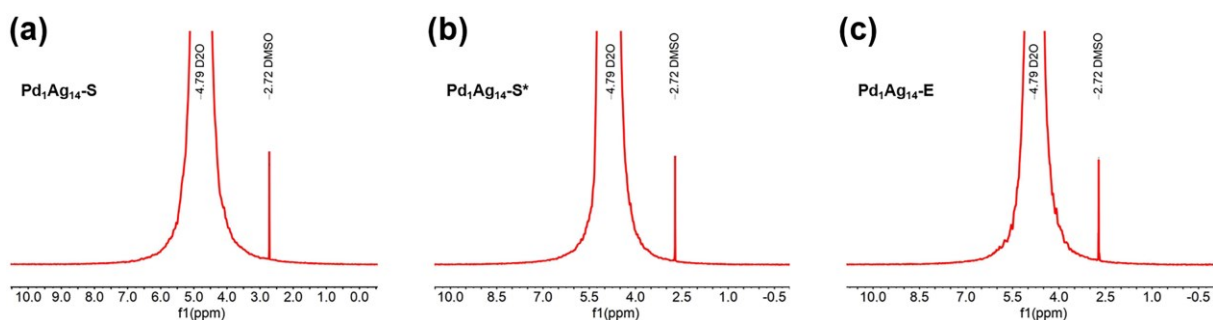

**Fig. S25** The  $^1\text{H}$  NMR spectra of the catholyte reaction solution for  $\text{Pd}_1\text{Ag}_{14}\text{-S/C}$ ,  $\text{Pd}_1\text{Ag}_{14}\text{-S}^*/\text{C}$  and  $\text{Pd}_1\text{Ag}_{14}\text{-E/C}$ . (a)  $\text{Pd}_1\text{Ag}_{14}\text{-S/C}$ ; (b)  $\text{Pd}_1\text{Ag}_{14}\text{-S}^*/\text{C}$ ; (c)  $\text{Pd}_1\text{Ag}_{14}\text{-E/C}$ . The spectra demonstrate the absence of any liquid products.

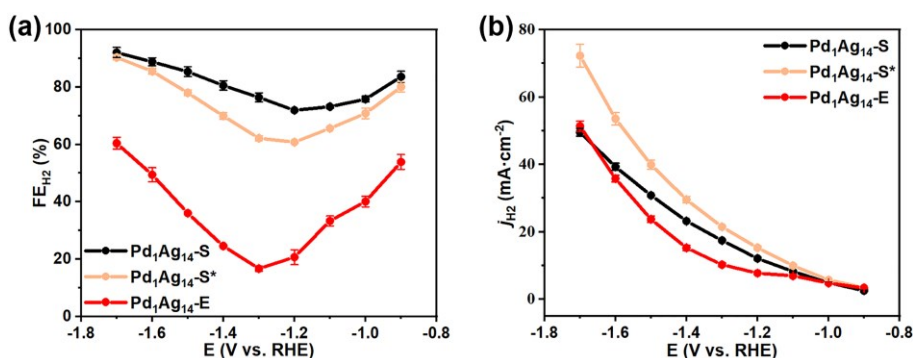

**Fig. S26** (a)  $\text{H}_2$  faradaic efficiency of the  $\text{Pd}_1\text{Ag}_{14}\text{-S/C}$  (black),  $\text{Pd}_1\text{Ag}_{14}\text{-S}^*/\text{C}$  (tan) and  $\text{Pd}_1\text{Ag}_{14}\text{-E/C}$  (red) at different potentials. (b)  $\text{H}_2$  partial current density of the  $\text{Pd}_1\text{Ag}_{14}\text{-S/C}$  (black),  $\text{Pd}_1\text{Ag}_{14}\text{-S}^*/\text{C}$  (tan) and  $\text{Pd}_1\text{Ag}_{14}\text{-E/C}$  (red) at different potentials.

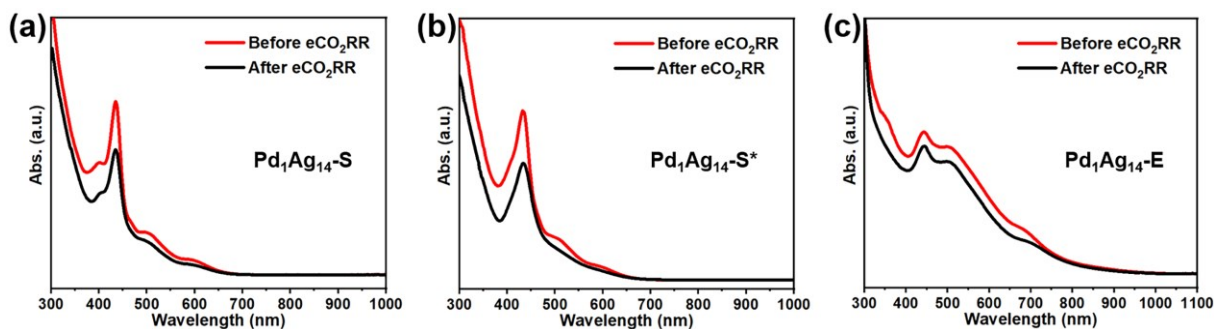

**Fig. S27** UV-vis absorbance spectra of the three nanoclusters before and after  $\text{eCO}_2\text{RR}$ . (a)  $\text{Pd}_1\text{Ag}_{14}\text{-S}$ ; (b)  $\text{Pd}_1\text{Ag}_{14}\text{-S}^*$ ; (c)  $\text{Pd}_1\text{Ag}_{14}\text{-E}$ .



### Section 3. Supporting Table

**Table S1** The crystal structure parameters for **Pd<sub>1</sub>Ag<sub>14</sub>(PPh<sub>3</sub>)<sub>8</sub>(SPh(CF<sub>3</sub>)<sub>2</sub>)<sub>6</sub> (Pd<sub>1</sub>Ag<sub>14</sub>-S).**

|                                             |                                                                                                                    |
|---------------------------------------------|--------------------------------------------------------------------------------------------------------------------|
| Empirical formula                           | C <sub>194</sub> H <sub>142</sub> Ag <sub>14</sub> Cl <sub>4</sub> F <sub>36</sub> P <sub>8</sub> PdS <sub>6</sub> |
| Formula weight                              | 5355.57                                                                                                            |
| Temperature/K                               | 170 K                                                                                                              |
| Crystal system                              | monoclinic                                                                                                         |
| Space group                                 | <i>P2<sub>1</sub>/c</i>                                                                                            |
| a/Å                                         | 17.460(9)                                                                                                          |
| b/Å                                         | 36.131(11)                                                                                                         |
| c/Å                                         | 18.471(6)                                                                                                          |
| α/°                                         | 90                                                                                                                 |
| β/°                                         | 110.07(2)                                                                                                          |
| γ/°                                         | 90                                                                                                                 |
| Volume/Å <sup>3</sup>                       | 10945(8)                                                                                                           |
| Z                                           | 2                                                                                                                  |
| ρ <sub>calc</sub> /g/cm <sup>3</sup>        | 1.625                                                                                                              |
| μ/mm <sup>-1</sup>                          | 1.541                                                                                                              |
| F(000)                                      | 5236.0                                                                                                             |
| Radiation                                   | Mo Kα (λ = 0.71073)                                                                                                |
| 2θ range for data collection/°              | 4.116 to 50                                                                                                        |
| Index ranges                                | -16 ≤ h ≤ 20, -42 ≤ k ≤ 42, -21 ≤ l ≤ 21                                                                           |
| Reflections collected                       | 62648                                                                                                              |
| Independent reflections                     | 19235 [R <sub>int</sub> = 0.0829, R <sub>sigma</sub> = 0.0869]                                                     |
| Data/restraints/parameters                  | 19235/1082/1006                                                                                                    |
| Goodness-of-fit on F <sup>2</sup>           | 1.073                                                                                                              |
| Final R indexes [I ≥ 2σ (I)]                | R <sub>1</sub> = 0.0931, wR <sub>2</sub> = 0.1956                                                                  |
| Final R indexes [all data]                  | R <sub>1</sub> = 0.1238, wR <sub>2</sub> = 0.2074                                                                  |
| Largest diff. peak/hole / e Å <sup>-3</sup> | 1.53/-1.31                                                                                                         |

**Table S2** The crystal structure parameters for **Pd<sub>1</sub>Ag<sub>14</sub>(P(Ph-*p*-OMe)<sub>3</sub>)<sub>7</sub>(SPh)<sub>6</sub>(Pd<sub>1</sub>Ag<sub>14</sub>-E)**.

|                                             |                                                                                                    |
|---------------------------------------------|----------------------------------------------------------------------------------------------------|
| Empirical formula                           | C <sub>183</sub> H <sub>177</sub> Ag <sub>14</sub> O <sub>21</sub> P <sub>7</sub> PdS <sub>6</sub> |
| Formula weight                              | 4738.19                                                                                            |
| Temperature/K                               | 170 K                                                                                              |
| Crystal system                              | triclinic                                                                                          |
| Space group                                 | <i>P</i> $\bar{1}$                                                                                 |
| a/Å                                         | 19.457(14)                                                                                         |
| b/Å                                         | 20.805(15)                                                                                         |
| c/Å                                         | 27.840(19)                                                                                         |
| $\alpha$ /°                                 | 82.006(16)                                                                                         |
| $\beta$ /°                                  | 74.854(18)                                                                                         |
| $\gamma$ /°                                 | 84.149(17)                                                                                         |
| Volume/Å <sup>3</sup>                       | 10747(13)                                                                                          |
| Z                                           | 2                                                                                                  |
| $\rho_{\text{calc}}/\text{cm}^3$            | 1.462                                                                                              |
| $\mu/\text{mm}^{-1}$                        | 1.488                                                                                              |
| F(000)                                      | 4684.0                                                                                             |
| Radiation                                   | Mo K $\alpha$ ( $\lambda = 0.71073$ )                                                              |
| 2 $\Theta$ range for data collection/°      | 3.828 to 50                                                                                        |
| Index ranges                                | -23 $\leq$ h $\leq$ 22, -24 $\leq$ k $\leq$ 24, -33 $\leq$ l $\leq$ 33                             |
| Reflections collected                       | 199172                                                                                             |
| Independent reflections                     | 37751 [ $R_{\text{int}} = 0.2071$ , $R_{\text{sigma}} = 0.1511$ ]                                  |
| Data/restraints/parameters                  | 37751/3026/1802                                                                                    |
| Goodness-of-fit on F <sup>2</sup>           | 1.012                                                                                              |
| Final R indexes [ $I \geq 2\sigma(I)$ ]     | $R_1 = 0.1045$ , $wR_2 = 0.3055$                                                                   |
| Final R indexes [all data]                  | $R_1 = 0.1754$ , $wR_2 = 0.3468$                                                                   |
| Largest diff. peak/hole / e Å <sup>-3</sup> | 2.48/-2.76                                                                                         |

**Table S3** The atomic ratio of Pd, Ag, S, P, F, and O elements in **Pd<sub>1</sub>Ag<sub>14</sub>-S\*** nanocluster was calculated by XPS and EDS measurements.

| <b>Pd<sub>1</sub>Ag<sub>14</sub>-S*</b> | <b>Ag (%)</b> | <b>Pd (%)</b> | <b>S (%)</b> | <b>P (%)</b> | <b>F (%)</b> | <b>O (%)</b> |
|-----------------------------------------|---------------|---------------|--------------|--------------|--------------|--------------|
| XPS result                              | 22.84         | 1.65          | 9.78         | 13.55        | 31.46        | 20.72        |
| EDS result                              | 25.37         | 1.83          | 10.37        | 13.78        | 28.41        | 20.24        |

**Table S4** Based on Ag atom (one **Pd<sub>1</sub>Ag<sub>14</sub>-S\*** nanocluster contains 14 Ag atoms), the ratio of Ag, F, and O elements in **Pd<sub>1</sub>Ag<sub>14</sub>-S\*** nanocluster was calculated by XPS and EDS measurements in Table 3.

| <b>Pd<sub>1</sub>Ag<sub>14</sub>-S*</b> | <b>Ag</b> | <b>F</b> | <b>O</b> |
|-----------------------------------------|-----------|----------|----------|
| XPS result                              | 14        | 19.3     | 12.7     |
| EDS result                              | 14        | 15.7     | 11.2     |
